# Supplementary material
Source: Springer Nature journal article supplement (https://www.springermedizin.de/resource/supplementary/12905_2012_504_MOESM2_ESM.pdf/9518634)

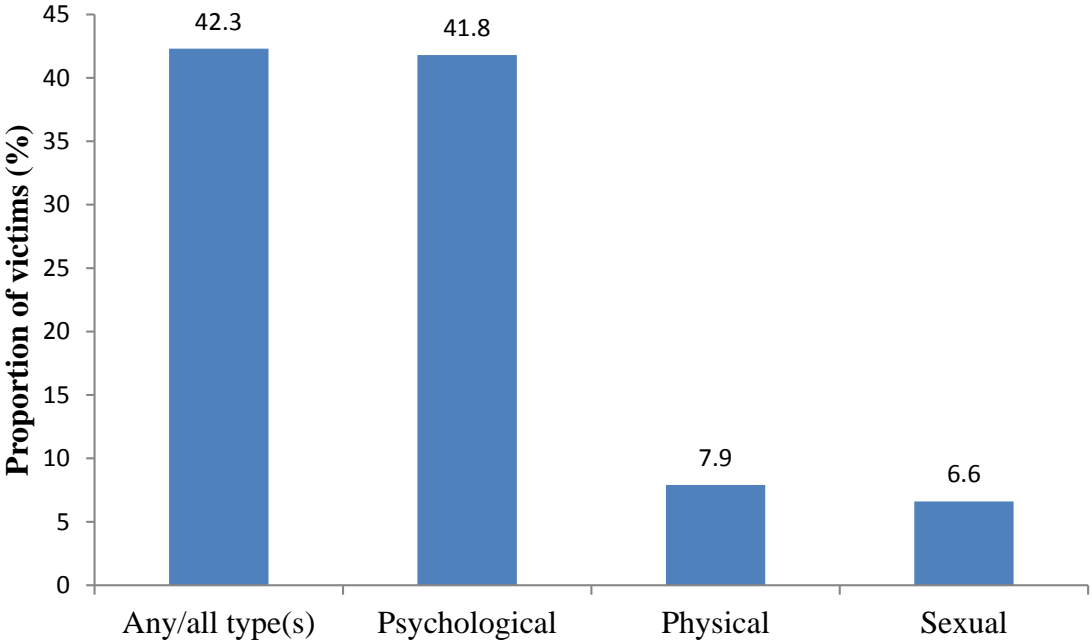

Supplement: MOESM2 [file 9518634]
